# Supplementary material for: Colorimetric sensing of alkaline phosphatase and α-fetoprotein based on the photoinduced oxidase activity of fluorescein
Source: Royal Society of Chemistry journal article supplement (doi:10.1039/c8nj06427j), 2019-01-01
Supplement: c8nj06427j1.pdf [file c8nj06427j1.pdf]

## *Supplementary materials*

### **Colorimetric Sensing Alkaline Phosphatase and $\alpha$ -Fetoprotein based on the Photoinduced Oxidase Activity of Fluorescein**

**Xuemei Hu, Chaoqun Sun, Ying Shi, Yijuan Long, Huzhi Zheng\***

Key Laboratory of Luminescent and Real-Time Analytical Chemistry (Southwest University), Ministry of Education, College of Chemistry and Chemical Engineering, Southwest University, Beibei, Chongqing 400715, China

Corresponding author: Huzhi Zheng, E-mail: [zhenghz@swu.edu.cn](mailto:zhenghz@swu.edu.cn).

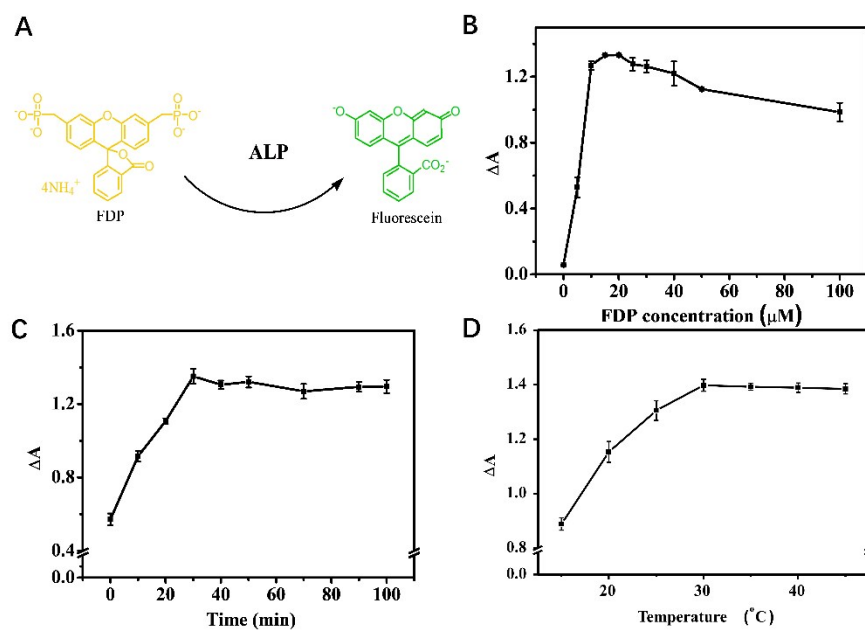

**Fig. S1** Condition optimization of hydrolysis process. (A) Hydrolysis diagram of FDP. (B) Optimization of FDP concentrations. hydrolysis time, 40 min; hydrolysis temperature, 35°C. (C) hydrolysis time. FDP, 20  $\mu$ M; hydrolysis temperature, 35°C. (D) hydrolysis temperature. FDP, 20  $\mu$ M; hydrolysis time, 40 min.  $\Delta A = A - A_0$ , where A and  $A_0$  represents the absorbance at 652 nm in the presence and absence of 50 mU/mL ALP, respectively. TMB, 0.80 mM; illumination time, 40 min; hydrolysis buffer, pH 8.0 Tris-HCl; chromogenic buffer, pH 4.0 HAc-NaAc. The error bars represent the standard deviation of three measurements.

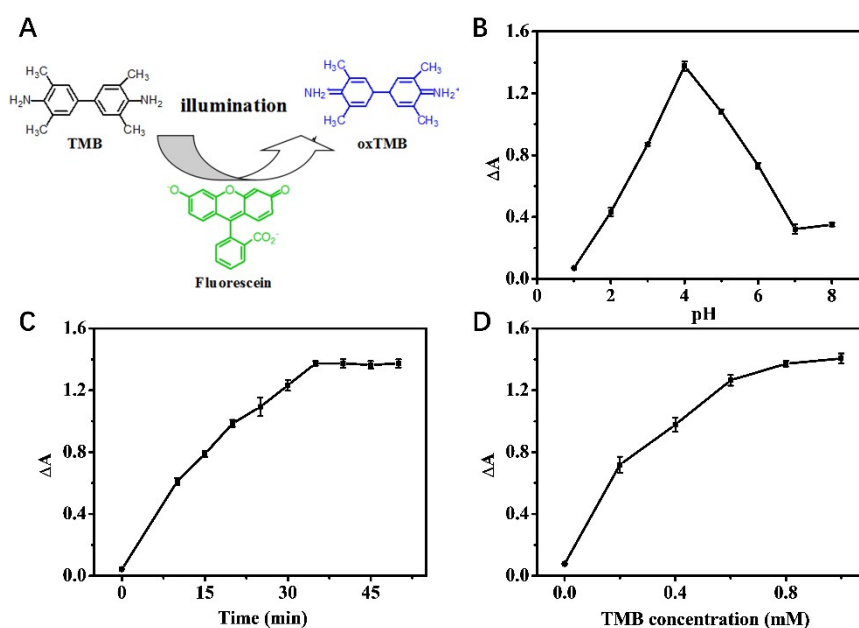

**Fig. S2** Condition optimization in the process of catalytic chromogenic reaction. (A) Photoinduced TMB color change diagram; (B) optimization of pH; TMB, 0.80 mM; illumination time, 40 min. (C) optimization of illumination time; TMB, 0.80 mM; chromogenic buffer, pH 4.0 HAc-NaAc; (D) optimization of TMB concentrations. illumination time, 40 min; chromogenic buffer, pH 4.0 HAc-NaAc.  $\Delta A = A - A_0$ , where A and  $A_0$  represents the absorbance at 652 nm in the presence and absence of 50 mU/mL ALP, respectively. FDP, 20  $\mu$ M; hydrolysis time, 40 min; hydrolysis temperature, 35°C; hydrolysis buffer, pH 8.0 Tris-HCl. The error bars represent the standard deviation of three measurements.

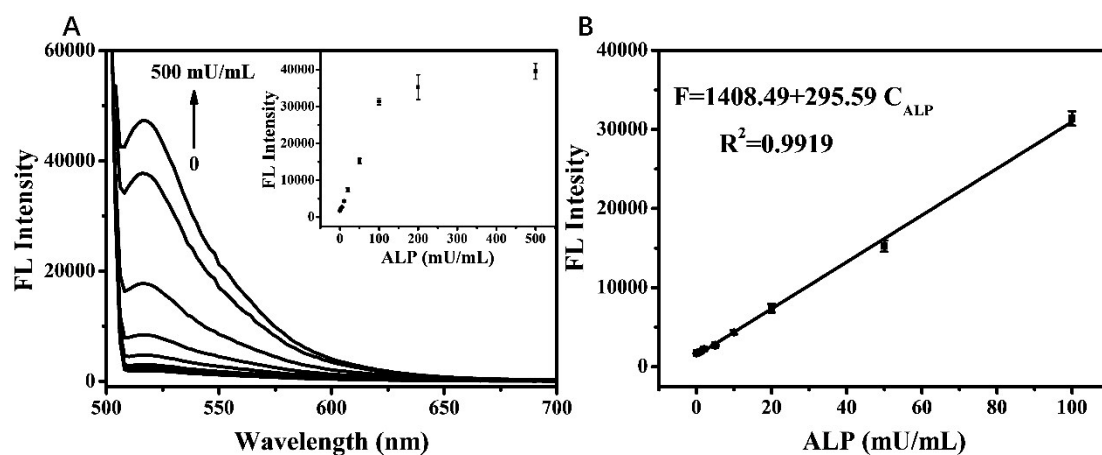

**Fig. S3** Conventional fluorescence method to measure different concentrations of ALP (0, 1, 2, 5, 10, 20, 50, 100, 200 mU/mL); Experimental conditions for the enzymatic reaction: FDP, 20  $\mu$ M; hydrolysis time, 40 min; hydrolysis temperature, 35°C; hydrolysis buffer, pH 8.0 Tris-HCl; Ex: 480 nm, Em: 530 nm. The error bars represent the standard deviation of three measurements

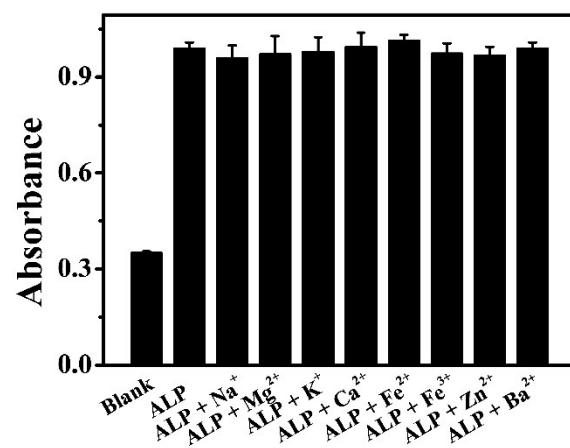

**Fig. S4** Effects of coexisting inorganic salt ions on the sensing of ALP. Experimental conditions for the reaction: FDP, 20  $\mu$ M; ALP, 20 mU/mL; other inorganic salt ions (Na<sup>+</sup>, Mg<sup>2+</sup>, K<sup>+</sup>, Ca<sup>2+</sup>, Fe<sup>2+</sup>, Fe<sup>3+</sup>, Zn<sup>2+</sup> and Ba<sup>2+</sup>, 10  $\mu$ M). The error bars represent the standard deviation of three measurements.

**Table S1** Comparison of the current work other reported methods for the detection of ALP.

| Method            | Sensing system             | Detection range(mU/mL) | LOD (mU/mL) | Ref.      |
|-------------------|----------------------------|------------------------|-------------|-----------|
| Chemiluminescence | CSPD substrate             | 0.01-10                | 0.01        | [1]       |
| Fluorometry       | CdS QDs                    | 0-50                   | 0.5         | [2]       |
| Fluorometry       | TPDA-PPI                   | 0-200                  | 0.09        | [3]       |
| Colorimetry       | AuNPs/ATP                  | 100-600                | 10          | [4]       |
| Colorimetry       | AuNPs/ATP/Ca <sup>2+</sup> | 5-100                  | 0.1         | [5]       |
|                   | AuNPs/ATP/Pb <sup>2+</sup> | 0.2-20                 | 0.1         |           |
| Colorimetry       | Redox active nanoceria     | 0.04-2                 | 0.04        | [6]       |
| Colorimetry       | Calcein-Ce <sup>3+</sup>   | 0.1-0.4<br>0.4-1.2     | 0.023       | [7]       |
| Colorimetry       | FDP-ALP-TMB                | 0.2-80                 | 0.18        | This work |

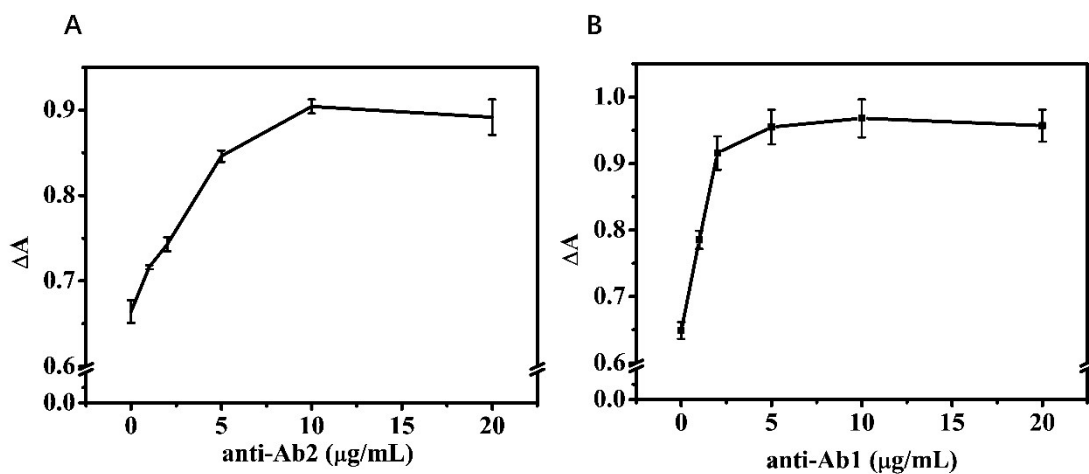

**Fig. S5** Optimizing of AFP anti-Ab2 and anti-Ab1 concentrations for ELISA. (A) Optimization of anti-Ab2 concentrations. anti-Ab1, 5  $\mu\text{g/mL}$ ; AFP, 20  $\text{ng/mL}$ . (B) Optimization of anti-Ab1 concentrations. anti-Ab2, 10  $\mu\text{g/mL}$ ; Other conditions are the optimized conditions for the reaction.  $\Delta A = A - A_0$ , where A and  $A_0$  represents the absorbance at 652 nm in the presence and absence of AFP, respectively. The error bars represent the standard deviation of three measurement.

**Table S2** Comparison of our AFP detection method with other methods.

| Method                  | Sensing system                                       | Detection range(ng/mL ) | LOD (ng/mL) | Ref.      |
|-------------------------|------------------------------------------------------|-------------------------|-------------|-----------|
| Chemiluminescence       | Luminol-H <sub>2</sub> O <sub>2</sub> -HRP-PBP       | 0.1–5.0                 | 0.01        | [8]       |
| Immunochemistry         | QD-based ICTS                                        | —                       | 1.0         | [6]       |
| Fluorescence-anisotropy | Methylene blue-doped SiNPs                           | 1.9–51.9                | —           | [9]       |
| Fluorometry             | Calcein-Ce <sup>3+</sup>                             | 0.2–1.0, 1.0–4.0        | 0.041       | [7]       |
| Colorimetry             | silver nanoparticles                                 | 1–100                   | 0.23        | 10        |
| Colorimetry             | SA-HRP-Cu-3(PO <sub>4</sub> ) (2) hybrid nanoflowers | 0.1-50                  | 0.078       | [11]      |
| Colorimetry             | FDP-ALP-TMB                                          | 0.5-50                  | 0.2         | This work |



1. Blum J, Li R, Ag, Barry M An optimized method for the chemiluminescent detection of alkaline phosphatase levels during osteodifferentiation by bone morphogenetic protein 2. *Journal of Cellular Biochemistry*, (2015) 80:532-537.
2. Malashikhina N, Garaiibabe G, Pavlov V Unconventional Application of Conventional Enzymatic Substrate: First Fluorogenic Immunoassay Based on Enzymatic Formation of Quantum Dots. *Analytical Chemistry*, (2013) 85:6866-6870.
3. Jian S, Tao H, Chen C, Dan Z, Fan Y, Yang X Fluorescence Immunoassay System via Enzyme-Enabled in Situ Synthesis of Fluorescent Silicon Nanoparticles. *Analytical Chemistry*, (2016) 88:9789-9795.
4. Kim TI, Kim H, Choi Y, Kim Y A fluorescent turn-on probe for the detection of alkaline phosphatase activity in living cells. *Chemical Communications*, (2011) 47:9825-9827.
5. Zhao W, Chiuman W, Lam JC, Brook MA, Li Y Simple and rapid colorimetric enzyme sensing assays using non-crosslinking gold nanoparticle aggregation. *Chemical Communications*, (2007) 36:3729-3731.
6. Yang Q, Gong X, Song T, Yang J, Zhu S, Li Y, Cui Y, Li Y, Zhang B, Chang J Quantum dot-based immunochromatography test strip for rapid, quantitative and sensitive detection of alpha fetoprotein. *Biosensors & Bioelectronics*, (2011) 30:145-150.
7. Chen C, Zhao J, Lu Y, Jian S, Yang X Fluorescence Immunoassay Based on the Phosphate-Triggered Fluorescence Turn-on Detection of Alkaline Phosphatase. *Analytical Chemistry*, (2018) 90:3505-3511.
8. Bi S, Yan Y, Yang X, Zhang S Gold Nanolabels for New Enhanced Chemiluminescence Immunoassay of Alpha-Fetoprotein Based on Magnetic Beads. *Chemistry - A European Journal*, (2010) 15:4704-4709.
9. Deng T, Li JS, Jiang JH, Shen GL, Yu RQ Preparation of Near-IR Fluorescent Nanoparticles for Fluorescence-Anisotropy-Based Immunoagglutination Assay in Whole Blood. *Advanced Functional Materials*, (2010) 16:2147-2155.
10. Ren RR, Cai GN, Yu ZZ, Zeng RY, Tang DP.. Metal-polydopamine framework: an innovative signal-generation tag for colorimetric immunoassay. *Analytical Chemistry*, *acs.analchem*. (2018) 90:11099-11105.
11. Liu Y, Chen J, Du M, Wang X, Ji X, He Z The preparation of dual-functional hybrid nanoflower and its application in the ultrasensitive detection of disease-related biomarker. *Biosensors & Bioelectronics*, (2017) 92:68-73.

## References
